# Supplementary material for: Effect of resistance exercise dose components for tendinopathy management: a systematic review with meta-analysis
Source: HighWire-hosted journal article supplement (doi:10.1136/bjsports-2022-105754), 2023-05-11
Supplement: bjsports-2022-105754supp005_data_supplement.pdf [file bjsports-2022-105754supp005_data_supplement.pdf]

## SF5: Extraction codebook

| Column        | Heading                        | Description                                                                                        |                                                                                                                                                                                                                                                                  |
|---------------|--------------------------------|----------------------------------------------------------------------------------------------------|------------------------------------------------------------------------------------------------------------------------------------------------------------------------------------------------------------------------------------------------------------------|
| Study Details | A                              | Initials Reviewer                                                                                  | Identification of individual extracting information                                                                                                                                                                                                              |
|               | B                              | Covidence Identifier                                                                               | Reference number for Covidence                                                                                                                                                                                                                                   |
|               | C                              | Author                                                                                             | First author surname <i>et al.</i> ,                                                                                                                                                                                                                             |
|               | D                              | Year                                                                                               | Year of publication                                                                                                                                                                                                                                              |
|               | E                              | Title                                                                                              | Study title                                                                                                                                                                                                                                                      |
|               | F                              | Country                                                                                            | Country where study was conducted                                                                                                                                                                                                                                |
|               | G                              | Journal                                                                                            | Journal name                                                                                                                                                                                                                                                     |
|               | H                              | Aims/Purpose                                                                                       | Study aims/purpose                                                                                                                                                                                                                                               |
|               | I                              | Tendinopathy type                                                                                  | 1=Achilles; 2= Lateral elbow (tennis); 3 = Patellar; 4 = Rotator cuff related shoulder pain (RCRSP)                                                                                                                                                              |
|               | J                              | Study Design                                                                                       | RCT = 1; Quasi-experimental = 2                                                                                                                                                                                                                                  |
|               | K                              | Age Mean                                                                                           | Mean age of study sample as a whole                                                                                                                                                                                                                              |
|               | L                              | Age SD                                                                                             | Standard deviation age of study sample as a whole                                                                                                                                                                                                                |
|               | M                              | Baseline Total N                                                                                   | Total sample across all interventions measured at baseline                                                                                                                                                                                                       |
|               | N                              | Training Status Description                                                                        | Brief description of training status of study sample as a whole                                                                                                                                                                                                  |
|               | O                              | Training Status Code                                                                               | 1 = Performance; 2 = Sporting; 3 = Other                                                                                                                                                                                                                         |
|               | P                              | Sex                                                                                                | Percentage female of study sample as a whole                                                                                                                                                                                                                     |
|               | Q                              | BMI Mean                                                                                           | Mean BMI of study sample as a whole                                                                                                                                                                                                                              |
|               | R                              | BMI SD                                                                                             | Standard deviation of BMI of study sample as a whole                                                                                                                                                                                                             |
|               | S                              | Symptom Severity Mean                                                                              | Mean severity measure at baseline of study sample as a whole                                                                                                                                                                                                     |
| T             | Symptom Severity SD            | Standard deviation of severity measure at baseline of study sample as a whole                      |                                                                                                                                                                                                                                                                  |
| U             | Symptom Duration Mean (Months) | Mean symptom duration reported in months                                                           |                                                                                                                                                                                                                                                                  |
| V             | Symptom Duration SD (Months)   | Standard deviation symptom duration reported in months                                             |                                                                                                                                                                                                                                                                  |
| W             | Population Comments            | Any additional information relevant to the participants investigated including diagnostic criteria |                                                                                                                                                                                                                                                                  |
| Outcomes      | X                              | Outcome Category                                                                                   | 1 = Disability; 2 = Pain on loading/activity; 3 = Pain over a specified time; 4 = Pain without further specification; 5 = Physical function capacity; 6 = Participant/patient rating overall condition; 7) Participation; 8) Quality of life; 9) Range of motion |
|               | Y                              | Outcome Tool                                                                                       | Description of outcome tool                                                                                                                                                                                                                                      |
|               | Z                              | Reflection                                                                                         | 1 = Increase in outcome indicates positive treatment; -1 = Decrease in outcome indicates positive treatment                                                                                                                                                      |
|               | AA                             | Measurement Time (Weeks)                                                                           | Time of measurement in weeks                                                                                                                                                                                                                                     |
| Intervention  | AB                             | Dominant Treatment Class                                                                           | <b>Only one dominant theme to be selected</b><br>1 = Resistance; 2 = Plyometric; 3 = Vibration; 4 = Flexibility; 5 = Movement pattern retraining                                                                                                                 |
|               | AC                             | Total Treatment class                                                                              | <b>Multiple themes to be selected as required</b><br>1 = Resistance; 2 = Plyometric; 3 = Vibration; 4 = Flexibility; 5 = Movement pattern retraining                                                                                                             |

|             |    |                                   |                                                                                                                                                                                                                                                                                                                   |
|-------------|----|-----------------------------------|-------------------------------------------------------------------------------------------------------------------------------------------------------------------------------------------------------------------------------------------------------------------------------------------------------------------|
|             | AD | Dose Comparison                   | 1 = Lower dose intervention; 2 = Higher dose intervention                                                                                                                                                                                                                                                         |
|             | AE | Intervention N                    | Intervention sample size at specified time                                                                                                                                                                                                                                                                        |
|             | AF | Intervention Total Duration       | Total duration of exercise intervention in weeks                                                                                                                                                                                                                                                                  |
|             | AG | Intervention Adherence %          | Reporting of adherence to exercise (reported as a percentage) if applicable                                                                                                                                                                                                                                       |
|             | AH | Intervention Location             | Location exercise was performed<br>1 = Home; 2 = Clinic; 3 = Fitness facility; 4 = NR; 5 = NA                                                                                                                                                                                                                     |
|             | AI | Intervention Volume               | Numerical value describing volume                                                                                                                                                                                                                                                                                 |
|             | AJ | Intervention Volume Category      | 1 = Duration of session (mins); 2 = sets * repetitions; 3 = number of repetitions; 4 = number of sets                                                                                                                                                                                                             |
|             | AK | Intervention Volume Comments      | Any additional information relevant.                                                                                                                                                                                                                                                                              |
|             | AL | Intervention Intensity            | Numerical value describing intensity                                                                                                                                                                                                                                                                              |
|             | AM | Intervention Intensity Category   | 1 = Absolute; 2 = Relative; 3=Bodyweight; 4=bodyweight+                                                                                                                                                                                                                                                           |
|             | AN | Intervention Frequency            | Number of sessions per week. Where there is progression, average value is to be entered.                                                                                                                                                                                                                          |
|             | AO | Intervention Frequency Comments   | Any additional information relevant.                                                                                                                                                                                                                                                                              |
|             | AP | Intervention Progression          | <b>Multiple themes to be selected as required</b><br>1 = No progression; 2 = NR; 3 = Progression volume; 4 = Progression intensity; 5 = Progression frequency; 6 = Progression specificity; 7 = Progression capacity; 8 = Other                                                                                   |
|             | AQ | Intervention Progression Comments | Any additional information relevant.                                                                                                                                                                                                                                                                              |
| <b>Data</b> | AR | Intervention Baseline Mean        | Baseline mean for exercise therapy                                                                                                                                                                                                                                                                                |
|             | AS | Intervention Baseline SD          | Baseline standard deviation for exercise therapy                                                                                                                                                                                                                                                                  |
|             | AT | Intervention Measurement Mean     | Mean of outcome for exercise therapy at stated time point                                                                                                                                                                                                                                                         |
|             | AU | Intervention Measurement SD       | Standard deviation of outcome for exercise therapy at stated time point                                                                                                                                                                                                                                           |
|             | AV | Measurement Comments              | State if a different value has been entered for means (e.g. median), a different value for standard deviations (e.g. standard error, IQR, percentiles, distance from mean to upper bound). Provide the relevant statistic (width of CI's, width of percentiles). Also state if data has extracted by digitization |

\* Outcome Specific. RCT=randomised controlled trial; SD=standard deviation; BMI= body mass index; NR= not reported; NA= not applicable; IQR=Inter Quartile Range; CI= confidence intervals.
