# Supplementary material for: Effect of resistance exercise dose components for tendinopathy management: a systematic review with meta-analysis
Source: HighWire-hosted journal article supplement (doi:10.1136/bjsports-2022-105754), 2023-05-11
Supplement: bjsports-2022-105754supp008_data_supplement.pdf [file bjsports-2022-105754supp008_data_supplement.pdf]

**SF8: Risk of Bias and confidence in cumulative evidence assessments**

Supplementary table 8A. Risk of Bias assessments per study. Assessments were made for each outcome in a study with the mode value selected and presented here. In the case of non-randomised studies, the first two domains (randomisation, allocation concealment) were judged as high risk as there was no control over allocation; the remaining domains were judged as for randomised studies.

| Author, Year (reference)*           | Random sequence generation | Allocation concealment | Blinding of participants/personnel | Blinding of outcome assessment | Incomplete outcome bias | Selective reporting | Other bias** |
|-------------------------------------|----------------------------|------------------------|------------------------------------|--------------------------------|-------------------------|---------------------|--------------|
| Agregaard et al 2021 <sup>1</sup>   | Low risk                   | Low risk               | High risk                          | Low risk                       | Low risk                | Low risk            | High risk    |
| Agregaard et al 2021 <sup>2</sup>   | Low risk                   | Low risk               | High risk                          | Low risk                       | Low risk                | Low risk            | Unclear      |
| Alfredson et al 1998 <sup>3</sup>   | High risk                  | Unclear                | High risk                          | Unclear                        | Low risk                | Unclear             | High risk    |
| Alfredson et al 1999 <sup>4</sup>   | High risk                  | High risk              | Unclear                            | Unclear                        | Low risk                | Unclear             | High risk    |
| Arias-Buría et al 2015 <sup>5</sup> | Low risk                   | Low risk               | High risk                          | Low risk                       | Low risk                | Unclear             | Low risk     |
| Arias-Buría et al 2017 <sup>6</sup> | Low risk                   | Low risk               | Unclear                            | Low risk                       | Unclear                 | Low risk            | High risk    |
| Bagcier et al 2021 <sup>7</sup>     | Low risk                   | Unclear                | Low risk                           | Low risk                       | Low risk                | Low risk            | Low risk     |
| Bahr et al 2006 <sup>8</sup>        | Low risk                   | Low risk               | High risk                          | Low risk                       | Low risk                | Unclear             | Low risk     |
| Balius et al 2016 <sup>9</sup>      | Low risk                   | Low risk               | Unclear                            | Low risk                       | Low risk                | Unclear             | Low risk     |
| Berg et al 2021 <sup>10</sup>       | Low risk                   | Unclear                | Unclear                            | Unclear                        | Low risk                | Low risk            | High risk    |
| Beyer et al 2015 <sup>11</sup>      | Low risk                   | Low risk               | Low risk                           | Low risk                       | Low risk                | Low risk            | High risk    |
| Blume et al 2015 <sup>12</sup>      | Unclear                    | Low risk               | Low risk                           | Low risk                       | Low risk                | Unclear             | Low risk     |
| Boudreau et al 2019 <sup>13</sup>   | Low risk                   | Low risk               | Low risk                           | Low risk                       | Low risk                | Low risk            | Low risk     |
| Breda et al 2020 <sup>14</sup>      | Low risk                   | Low risk               | High risk                          | Low risk                       | Low risk                | High risk           | High risk    |
| Breda et al 2022 <sup>15</sup>      | Low risk                   | Low risk               | High risk                          | Low risk                       | Low risk                | Low risk            | High risk    |
| Chaconas et al 2017 <sup>16</sup>   | Low risk                   | Unclear                | Unclear                            | Low risk                       | High risk               | Unclear             | High risk    |
| Cheng et al 2007 <sup>17</sup>      | High risk                  | High risk              | Unclear                            | Unclear                        | Unclear                 | Unclear             | High risk    |
| Cho et al 2017 <sup>18</sup>        | High risk                  | High risk              | Unclear                            | Unclear                        | Low risk                | Low risk            | Unclear      |

| Author, Year (reference)*             | Random sequence generation | Allocation concealment | Blinding of participants/personnel | Blinding of outcome assessment | Incomplete outcome bias | Selective reporting | Other bias** |
|---------------------------------------|----------------------------|------------------------|------------------------------------|--------------------------------|-------------------------|---------------------|--------------|
| Christiansen et al 2021 <sup>19</sup> | Low risk                   | Low risk               | Unclear                            | Unclear                        | Low risk                | Low risk            | High risk    |
| Corum et al 2021 <sup>20</sup>        | Low risk                   | Low risk               | High risk                          | Low risk                       | High risk               | Low risk            | High risk    |
| de Jonge et al 2008 <sup>21</sup>     | Unclear                    | Low risk               | Low risk                           | Low risk                       | Low risk                | Low risk            | Low risk     |
| de Vos et al 2007 <sup>22</sup>       | Low risk                   | Unclear                | Low risk                           | Low risk                       | Unclear                 | Low risk            | High risk    |
| Dejaco et al 2017 <sup>23</sup>       | Low risk                   | Low risk               | Low risk                           | Low risk                       | Low risk                | High risk           | Low risk     |
| Dimitrios et al 2012 <sup>24</sup>    | High risk                  | High risk              | Low risk                           | Low risk                       | Low risk                | Unclear             | High risk    |
| Dimitrios et al 2012 <sup>25</sup>    | High risk                  | High risk              | Low risk                           | Low risk                       | Low risk                | Unclear             | High risk    |
| Dogan et al 2021 <sup>26</sup>        | Unclear                    | Unclear                | Unclear                            | Unclear                        | Unclear                 | Unclear             | High risk    |
| Dupuis et al 2018 <sup>27</sup>       | Low risk                   | Low risk               | High risk                          | Low risk                       | Low risk                | Low risk            | High risk    |
| Eliason et al 2021 <sup>28</sup>      | High risk                  | Low risk               | Low risk                           | Low risk                       | Low risk                | Low risk            | High risk    |
| Ganderton et al 2018 <sup>29</sup>    | Low risk                   | Low risk               | Low risk                           | Low risk                       | Low risk                | Low risk            | High risk    |
| Gatz et al 2020 <sup>30</sup>         | Low risk                   | Low risk               | Low risk                           | Low risk                       | Unclear                 | Unclear             | High risk    |
| Giray et al 2019 <sup>31</sup>        | Low risk                   | Low risk               | High risk                          | Low risk                       | Low risk                | Low risk            | High risk    |
| Habets et al 2021 <sup>32</sup>       | Low risk                   | Low risk               | Unclear                            | Low risk                       | Low risk                | Low risk            | Low risk     |
| Hallgren et al 2014 <sup>33</sup>     | High risk                  | Low risk               | High risk                          | Low risk                       | Unclear                 | Low risk            | Low risk     |
| Hallgren et al 2017 <sup>34</sup>     | Unclear                    | Unclear                | Low risk                           | Low risk                       | Low risk                | Low risk            | Low risk     |
| Heron et al 2017 <sup>35</sup>        | Low risk                   | Low risk               | Low risk                           | Low risk                       | High risk               | High risk           | Low risk     |
| Hopewell et al 2021 <sup>36</sup>     | Low risk                   | Low risk               | High risk                          | Low risk                       | Low risk                | Low risk            | Low risk     |
| Hotta et al 2020 <sup>37</sup>        | Low risk                   | Low risk               | High risk                          | Low risk                       | Low risk                | Low risk            | High risk    |
| Johansson et al 2005 <sup>38</sup>    | Low risk                   | Unclear                | Unclear                            | Low risk                       | Low risk                | Unclear             | High risk    |

| <b>Author, Year (reference)*</b>              | <b>Random sequence generation</b> | <b>Allocation concealment</b> | <b>Blinding of participants/personnel</b> | <b>Blinding of outcome assessment</b> | <b>Incomplete outcome bias</b> | <b>Selective reporting</b> | <b>Other bias**</b> |
|-----------------------------------------------|-----------------------------------|-------------------------------|-------------------------------------------|---------------------------------------|--------------------------------|----------------------------|---------------------|
| Jonsson 2009 <sup>39</sup>                    | Unclear                           | Unclear                       | Unclear                                   | Unclear                               | Unclear                        | Unclear                    | Unclear             |
| Ketola et al 2009 <sup>40</sup>               | Low risk                          | Low risk                      | Unclear                                   | Low risk                              | Low risk                       | Unclear                    | High risk           |
| Knobloch et al 2007 <sup>41</sup>             | Low risk                          | Low risk                      | Unclear                                   | Unclear                               | High risk                      | Unclear                    | High risk           |
| Knobloch et al 2007 <sup>42</sup>             | Unclear                           | Unclear                       | High risk                                 | Low risk                              | Unclear                        | Unclear                    | High risk           |
| Knobloch et al 2008 <sup>43</sup>             | Unclear                           | Low risk                      | Unclear                                   | Unclear                               | Unclear                        | Unclear                    | High risk           |
| Kongsgaard et al <sup>44</sup>                | Low risk                          | Low risk                      | High risk                                 | Low risk                              | Low risk                       | Unclear                    | Low risk            |
| Kromer et al 2013 <sup>45</sup>               | Low risk                          | Low risk                      | Low risk                                  | Low risk                              | Low risk                       | Low risk                   | Low risk            |
| Kromer et al 2014 <sup>46</sup>               | Low risk                          | Low risk                      | High risk                                 | High risk                             | Low risk                       | Low risk                   | Low risk            |
| Littlewood et al 2016 <sup>47</sup>           | Low risk                          | Low risk                      | High risk                                 | High risk                             | Unclear                        | Unclear                    | High risk           |
| Luginbuhl et al 2008 <sup>48</sup>            | Unclear                           | Unclear                       | Unclear                                   | Unclear                               | Unclear                        | Unclear                    | High risk           |
| Maenhout et al 2013 <sup>49</sup>             | Unclear                           | High risk                     | High risk                                 | High risk                             | Low risk                       | Unclear                    | Low risk            |
| Mafi et al 2001 <sup>50</sup>                 | Low risk                          | Unclear                       | Unclear                                   | Unclear                               | Unclear                        | Unclear                    | High risk           |
| Manias et al 2006 <sup>51</sup>               | High risk                         | High risk                     | High risk                                 | High risk                             | Low risk                       | Unclear                    | Unclear             |
| Martinez-Silvestrini et al 2005 <sup>52</sup> | Unclear                           | Unclear                       | Unclear                                   | Unclear                               | Low risk                       | Unclear                    | High risk           |
| Marzetti et al 2014 <sup>53</sup>             | Low risk                          | Low risk                      | Low risk                                  | Low risk                              | Low risk                       | Low risk                   | Low risk            |
| McCormack et al 2016 <sup>54</sup>            | Low risk                          | Low risk                      | Unclear                                   | Unclear                               | Low risk                       | Low risk                   | Low risk            |
| Mulligan et al 2016 <sup>55</sup>             | Low risk                          | Low risk                      | Low risk                                  | Low risk                              | Low risk                       | Unclear                    | High risk           |
| Norregaard et al 2007 <sup>56</sup>           | Low risk                          | Low risk                      | Unclear                                   | Unclear                               | Unclear                        | Unclear                    | High risk           |

| Author, Year (reference)*               | Random sequence generation | Allocation concealment | Blinding of participants/personnel | Blinding of outcome assessment | Incomplete outcome bias | Selective reporting | Other bias** |
|-----------------------------------------|----------------------------|------------------------|------------------------------------|--------------------------------|-------------------------|---------------------|--------------|
| Nowotny et al 2018 <sup>57</sup>        | Low risk                   | Unclear                | Low risk                           | Low risk                       | High risk               | Unclear             | High risk    |
| Østerås et al 2010 <sup>58</sup>        | Low risk                   | Low risk               | High risk                          | High risk                      | Low risk                | Unclear             | High risk    |
| Park et al 2010 <sup>59</sup>           | Low risk                   | Unclear                | Unclear                            | Unclear                        | Unclear                 | Unclear             | High risk    |
| Pearson et al 2012 <sup>60</sup>        | Unclear                    | Unclear                | High risk                          | Unclear                        | Low risk                | Unclear             | High risk    |
| Pearson et al 2018 <sup>61</sup>        | Low risk                   | Low risk               | High risk                          | Low risk                       | Low risk                | Low risk            | High risk    |
| Pekyavas et al 2016 <sup>62</sup>       | Low risk                   | Low risk               | High risk                          | Low risk                       | Unclear                 | Unclear             | Low risk     |
| Petersen et al 2007 <sup>63</sup>       | Low risk                   | Unclear                | Unclear                            | Unclear                        | Unclear                 | Unclear             | High risk    |
| Peterson et al 2011 <sup>64</sup>       | Low risk                   | Low risk               | Unclear                            | High risk                      | Low risk                | Low risk            | Low risk     |
| Peterson et al 2014 <sup>65</sup>       | Low risk                   | Unclear                | Low risk                           | High risk                      | Low risk                | Low risk            | Low risk     |
| Praet et al 2019 <sup>66</sup>          | Low risk                   | Low risk               | Low risk                           | Low risk                       | Low risk                | Unclear             | Low risk     |
| Rabusin et al 2020 <sup>67</sup>        | Low risk                   | Low risk               | High risk                          | High risk                      | Low risk                | Low risk            | High risk    |
| Rabusin et al 2021 <sup>68</sup>        | Low risk                   | Low risk               | High risk                          | High risk                      | Low risk                | Low risk            | High risk    |
| Rio et al 2017 <sup>69</sup>            | Low risk                   | Low risk               | Low risk                           | Low risk                       | Low risk                | Low risk            | High risk    |
| Romero-Morales et al 2020 <sup>70</sup> | Unclear                    | Unclear                | Unclear                            | Unclear                        | Low risk                | Low risk            | High risk    |
| Rompe et al 2007 <sup>71</sup>          | Low risk                   | Low risk               | Unclear                            | Low risk                       | Low risk                | Unclear             | Low risk     |
| Rompe et al 2008 <sup>72</sup>          | Low risk                   | Low risk               | Unclear                            | Low risk                       | Low risk                | Unclear             | Unclear      |
| Rompe et al 2009 <sup>73</sup>          | Unclear                    | Low risk               | High risk                          | High risk                      | Low risk                | Unclear             | Low risk     |
| Rompe et al 2009 <sup>74</sup>          | Low risk                   | Low risk               | High risk                          | Low risk                       | Low risk                | Unclear             | Low risk     |
| Roos et al 2004 <sup>75</sup>           | Low risk                   | Unclear                | Unclear                            | Low risk                       | Low risk                | Unclear             | Low risk     |
| Ruffino et al 2021 <sup>76</sup>        | Low risk                   | Low risk               | High risk                          | Low risk                       | Low risk                | Unclear             | High risk    |
| Sahbaz et al 2021 <sup>77</sup>         | Low risk                   | Unclear                | Unclear                            | Unclear                        | Low risk                | Low risk            | Unclear      |
| Schydrowsky 2022 <sup>78</sup>          | Unclear                    | Low risk               | High risk                          | Low risk                       | Low risk                | Low risk            | High risk    |

| Author, Year (reference)*              | Random sequence generation | Allocation concealment | Blinding of participants/personnel | Blinding of outcome assessment | Incomplete outcome bias | Selective reporting | Other bias** |
|----------------------------------------|----------------------------|------------------------|------------------------------------|--------------------------------|-------------------------|---------------------|--------------|
| Şenbursa et al 2011 <sup>79</sup>      | Low risk                   | Unclear                | Unclear                            | Unclear                        | Low risk                | Unclear             | Low risk     |
| Sevier et al 2015 <sup>80</sup>        | Low risk                   | Unclear                | High risk                          | High risk                      | High risk               | Unclear             | High risk    |
| Shim et al 2021 <sup>81</sup>          | Low risk                   | Low risk               | High risk                          | Low risk                       | Low risk                | Unclear             | High risk    |
| Silbernagel et al 2001 <sup>82</sup>   | Unclear                    | Unclear                | Unclear                            | Unclear                        | Unclear                 | Unclear             | High risk    |
| Silbernagel et al 2007 <sup>83</sup>   | Low risk                   | Low risk               | High risk                          | High risk                      | Low risk                | Unclear             | Low risk     |
| Simşek et al 2013 <sup>84</sup>        | Unclear                    | Unclear                | Unclear                            | Low risk                       | Unclear                 | Unclear             | Unclear      |
| Slider et al 2013 <sup>85</sup>        | Low risk                   | Unclear                | Low risk                           | Low risk                       | Low risk                | Unclear             | Unclear      |
| Solomons et al 2020 <sup>86</sup>      | Low risk                   | Low risk               | Low risk                           | Low risk                       | Low risk                | Low risk            | Low risk     |
| Stasinopoulos 2013 <sup>87</sup>       | High risk                  | High risk              | High risk                          | Low risk                       | Low risk                | Unclear             | High risk    |
| Stasinopoulos et al 2006 <sup>88</sup> | High risk                  | High risk              | Unclear                            | Low risk                       | Low risk                | Unclear             | High risk    |
| Stasinopoulos et al 2010 <sup>89</sup> | High risk                  | High risk              | Low risk                           | Low risk                       | Low risk                | Unclear             | High risk    |
| Stasinopoulos et al 2017 <sup>90</sup> | Low risk                   | Unclear                | Low risk                           | Low risk                       | Low risk                | Unclear             | High risk    |
| Stefansson et al 2019 <sup>91</sup>    | Low risk                   | Unclear                | High risk                          | Low risk                       | High risk               | Unclear             | Low risk     |
| Steunebrink et al 2013 <sup>92</sup>   | Low risk                   | Low risk               | Low risk                           | Low risk                       | Low risk                | Unclear             | Low risk     |
| Stevens et al 2014 <sup>93</sup>       | Unclear                    | Unclear                | High risk                          | High risk                      | Unclear                 | Unclear             | High risk    |
| Svernlöv et al 2001 <sup>94</sup>      | High risk                  | High risk              | Unclear                            | Unclear                        | Unclear                 | Unclear             | High risk    |
| Tonks et al 2007 <sup>95</sup>         | Low risk                   | Low risk               | Low risk                           | High risk                      | High risk               | Low risk            | Low risk     |
| Turgut et al 2017 <sup>96</sup>        | Low risk                   | Unclear                | Unclear                            | Unclear                        | High risk               | Unclear             | Low risk     |
| Vallés-Carrascosa                      | Low risk                   | Low risk               | Low risk                           | High risk                      | Low risk                | Low risk            | High risk    |

| Author, Year (reference)*                | Random sequence generation | Allocation concealment | Blinding of participants/personnel | Blinding of outcome assessment | Incomplete outcome bias | Selective reporting | Other bias** |
|------------------------------------------|----------------------------|------------------------|------------------------------------|--------------------------------|-------------------------|---------------------|--------------|
| et al 2018 <sup>97</sup>                 |                            |                        |                                    |                                |                         |                     |              |
| vanArk et al 2016 <sup>98</sup>          | Low risk                   | Low risk               | Low risk                           | Unclear                        | Unclear                 | Low risk            | Low risk     |
| Vinuesa-Montoya et al 2017 <sup>99</sup> | Low risk                   | Low risk               | High risk                          | Low risk                       | Low risk                | Low risk            | Low risk     |
| Visnes et al 2005 <sup>100</sup>         | Low risk                   | Low risk               | High risk                          | Low risk                       | Unclear                 | Unclear             | Unclear      |
| Vuvan et al 2019 <sup>101</sup>          | Low risk                   | Low risk               | High risk                          | High risk                      | Low risk                | Low risk            | Low risk     |
| Walther et al 2004 <sup>102</sup>        | Unclear                    | Unclear                | Unclear                            | Unclear                        | Low risk                | Unclear             | Unclear      |
| Wegener et al 2016 <sup>103</sup>        | Low risk                   | Low risk               | High risk                          | Low risk                       | Low risk                | Unclear             | High risk    |
| Wen et al 2011 <sup>104</sup>            | Unclear                    | Unclear                | Low risk                           | Unclear                        | High risk               | Unclear             | High risk    |
| Werner et al 2002 <sup>105</sup>         | Low risk                   | Unclear                | Unclear                            | Unclear                        | Unclear                 | Unclear             | High risk    |
| Wiedman et al 2017 <sup>106</sup>        | Low risk                   | Low risk               | Unclear                            | Unclear                        | Unclear                 | Unclear             | High risk    |
| Yelland et al 2011 <sup>107</sup>        | Low risk                   | Low risk               | High risk                          | Low risk                       | Low risk                | Unclear             | Low risk     |
| Yilmaz et al 2022 <sup>108</sup>         | Unclear                    | Low risk               | Unclear                            | Low risk                       | Low risk                | Unclear             | High risk    |
| Young et al 2005 <sup>109</sup>          | Unclear                    | Unclear                | High risk                          | Low risk                       | High risk               | Unclear             | High risk    |
| Yu et al 2013 <sup>110</sup>             | Low risk                   | Low risk               | Low risk                           | Unclear                        | Low risk                | Unclear             | Unclear      |

\*Included studies reference list in supplementary SF7-B.

\*\*Note: The “other bias” category captures any bias not covered in the other domains. Specifically in this review we used the examples below to help with judging “other bias”. Criteria for ‘High risk’ on assessing “other bias” include:

- Measurement of the outcome differed between intervention groups. Outcomes would usually be comparable across intervention groups in studies with pre-specific outcomes. For example: does one treatment group result in more frequent clinic visits (e.g., home exercise program vs. physiotherapy-led treatment)?
- Inappropriate outcome measurement tools used and/or uncertainty in their validity and reliability e.g., self-reported measures may have higher risk of bias than clinically observed outcomes.
- Design-specific bias:
  - Duration of follow-up that is different across comparison groups within a study, this difference could be a source of bias.

- The issue of study populations that are systematically different between comparison groups within a study (e.g., important baseline imbalances) may be a source of bias; the population selected for the focus of the study (e.g., inclusion and exclusion criteria) would need to be considered.
- Failure of study to maintain fidelity to the intervention protocol resulting in performance bias.
- Conflict of Interest from Sponsor Bias resulting in:
  - The selection of designs and hypotheses; choosing non-inferiority rather than superiority approaches, picking comparison drugs and doses, choosing outcomes, or using composite endpoints (e.g., quality of life) without presenting data on individual endpoints.
  - Selective outcome reporting e.g., “cherry-picking” from multiple endpoints.
  - Biased presentation of results.
  - Publication bias.

Supplementary table 8B. Overall RoB and confidence in cumulative evidence assessment for moderator levels in meta-regression investigating resistance exercise intensity.

| Moderator             | Model                              | Overall RoB | Inconsistency | Imprecision | Indirectness | Small study-effects | Confidence in Evidence |
|-----------------------|------------------------------------|-------------|---------------|-------------|--------------|---------------------|------------------------|
| Intensity: Body mass  | All tendinopathies/ Large-effects  | Low risk    | Low risk      | High risk   | Low risk     | High risk           | Low                    |
| Intensity: Additional | All tendinopathies/ Large-effects  | Low risk    | Low risk      | Low risk    | Low risk     | High risk           | Moderate               |
| Intensity: Body mass  | Achilles/ Large-effects            | Low risk    | Low risk      | High risk   | Low risk     | High risk           | Low                    |
| Intensity: Additional | Achilles / Large-effects           | Low risk    | Low risk      | High risk   | Low risk     | High risk           | Low                    |
| Intensity: Body mass  | RCRSP/ Large-effects               | Low risk    | Low risk      | High risk   | Low risk     | High risk           | Low                    |
| Intensity: Additional | RCRSP/ Large-effects               | Low risk    | Low risk      | Low risk    | Low risk     | High risk           | Moderate               |
| Intensity: Body mass  | Patellar/ Large-effects            | Low risk    | High risk     | High risk   | Low risk     | High risk           | Very low               |
| Intensity: Additional | Patellar/ Large-effects            | Low risk    | Low risk      | High risk   | Low risk     | High risk           | Low                    |
|                       |                                    |             |               |             |              |                     |                        |
| Intensity: Body mass  | All tendinopathies/ Small-effects  | Low risk    | Low risk      | High risk   | Low risk     | High risk           | Low                    |
| Intensity: Additional | All tendinopathies/ Small -effects | Low risk    | Low risk      | Low risk    | Low risk     | High risk           | Moderate               |
| Intensity: Body mass  | Achilles/ Small-effects            | Low risk    | High risk     | High risk   | Low risk     | High risk           | Very low               |
| Intensity: Additional | Achilles / Small-effects           | Low risk    | High risk     | High risk   | Low risk     | High risk           | Very low               |
| Intensity: Body mass  | RCRSP / Small-effects              | Low risk    | High risk     | High risk   | Low risk     | High risk           | Very low               |
| Intensity: Additional | RCRSP / Small-effects              | Low risk    | Low risk      | Low risk    | Low risk     | High risk           | Moderate               |



Supplementary table 8C. Overall RoB and confidence in cumulative evidence assessment for moderator levels in meta-regression investigating resistance exercise frequency.

| Moderator                         | Model                             | Overall RoB | Inconsistency | Imprecision | Indirectness | Small study-effects | Confidence in evidence |
|-----------------------------------|-----------------------------------|-------------|---------------|-------------|--------------|---------------------|------------------------|
| Frequency: Less than daily        | All tendinopathies/ Large-effects | Low risk    | High risk     | High risk   | Low risk     | High risk           | Low                    |
| Frequency: Daily                  | All tendinopathies/ Large-effects | Low risk    | Low risk      | Low risk    | Low risk     | High risk           | Moderate               |
| Frequency: More than once per day | All tendinopathies/ Large-effects | Low risk    | Low risk      | Low risk    | Low risk     | High risk           | Moderate               |
| Frequency: Less than daily        | Achilles/ Large-effects           | Low risk    | High risk     | High risk   | Low risk     | High risk           | Very low               |
| Frequency: Daily                  | Achilles/ Large-effects           | Low risk    | Low risk      | High risk   | Low risk     | High risk           | Low                    |
| Frequency: More than once per day | Achilles/ Large-effects           | Low risk    | Low risk      | Low risk    | Low risk     | High risk           | Moderate               |
| Frequency: Less than daily        | RCRSP/ Large-effects              | Low risk    | Low risk      | Low risk    | Low risk     | High risk           | Moderate               |
| Frequency: Daily                  | RCRSP/ Large-effects              | Low risk    | Low risk      | Low risk    | Low risk     | High risk           | Moderate               |
| Frequency: More than once per day | RCRSP/ Large-effects              | Low risk    | Low risk      | High risk   | Low risk     | High risk           | Low                    |
|                                   |                                   |             |               |             |              |                     |                        |
| Frequency: Less than daily        | All tendinopathies/ Small-effects | Low risk    | High risk     | High risk   | Low risk     | High risk           | Very low               |
| Frequency: Daily                  | All tendinopathies/ Small-effects | Low risk    | Low risk      | High risk   | Low risk     | High risk           | Low                    |
| Frequency: More than once per day | All tendinopathies/ Small-effects | Low risk    | Low risk      | Low risk    | Low risk     | High risk           | Moderate               |
| Frequency: Less than daily        | Achilles/ Small-effects           | Low risk    | High risk     | High risk   | Low risk     | High risk           | Very low               |
| Frequency: Daily                  | Achilles/ Small-effects           | Low risk    | Low risk      | High risk   | Low risk     | High risk           | Low                    |
| Frequency: More than once per day | Achilles/ Small-effects           | High risk   | High risk     | Low risk    | Low risk     | High risk           | Very low               |
| Frequency: Less than daily        | RCRSP/ Small-effects              | Low risk    | Low risk      | Low risk    | Low risk     | High risk           | Moderate               |
| Frequency: Daily                  | RCRSP/ Small-effects              | Low risk    | High risk     | High risk   | Low risk     | High risk           | Very low               |

|                                            |                         |          |          |           |          |              |     |
|--------------------------------------------|-------------------------|----------|----------|-----------|----------|--------------|-----|
| Frequency:<br>More than<br>once per<br>day | RCRSP/<br>Small-effects | Low risk | Low risk | High risk | Low risk | High<br>risk | Low |
|--------------------------------------------|-------------------------|----------|----------|-----------|----------|--------------|-----|

Supplementary table 8D. Overall RoB and confidence in cumulative evidence assessment for moderator levels in meta-regression investigating resistance exercise volume.

| Moderator    | Model                             | Overall RoB | Inconsistency | Imprecision | Indirectness | Small study-effects | Confidence in evidence |
|--------------|-----------------------------------|-------------|---------------|-------------|--------------|---------------------|------------------------|
| Volume: Low  | All tendinopathies/ Large-effects | Low risk    | Low risk      | Low risk    | Low risk     | High risk           | Moderate               |
| Volume: High | All tendinopathies/ Large-effects | Low risk    | Low risk      | Low risk    | Low risk     | High risk           | Moderate               |
| Volume: Low  | Achilles/ Large-effects           | Low risk    | High risk     | High risk   | Low risk     | Low risk            | Low                    |
| Volume: High | Achilles / Large-effects          | Low risk    | Low risk      | Low risk    | Low risk     | High risk           | Moderate               |
| Volume: Low  | RCRSP/ Large-effects              | Low risk    | Low risk      | Low risk    | Low risk     | High risk           | Moderate               |
| Volume: High | RCRSP/ Large-effects              | Low risk    | Low risk      | Low risk    | Low risk     | High risk           | Moderate               |
| Volume: Low  | Patellar/ Large-effects           | Low risk    | Low risk      | High risk   | Low risk     | High risk           | Low                    |
| Volume: High | Patellar/ Large-effects           | Low risk    | Low risk      | High risk   | Low risk     | High risk           | Low                    |
| Volume: Low  | Elbow/ Large-effects              | Low risk    | Low risk      | High risk   | Low risk     | High risk           | Low                    |
| Volume: High | Elbow/ Large-effects              | Low risk    | Low risk      | High risk   | Low risk     | High risk           | Low                    |
|              |                                   |             |               |             |              |                     |                        |
| Volume: Low  | All tendinopathies/ Small-effects | Low risk    | Low risk      | Low risk    | Low risk     | High risk           | Moderate               |
| Volume: High | All tendinopathies/ Small-effects | Low risk    | Low risk      | Low risk    | Low risk     | High risk           | Moderate               |
| Volume: Low  | RCRSP/ Small-effects              | Low risk    | Low risk      | Low risk    | Low risk     | High risk           | Moderate               |
| Volume: High | RCRSP/ Small-effects              | Low risk    | Low risk      | High risk   | Low risk     | High risk           | Low                    |
| Volume: Low  | Patellar/ Small-effects           | Low risk    | Low risk      | High risk   | Low risk     | High risk           | Low                    |
| Volume: High | Patellar/ Small-effects           | Low risk    | Low risk      | High risk   | Low risk     | High risk           | Low                    |
